# Supplementary material for: Establishment of Novel Limbus-Derived, Highly Proliferative ABCG2+/ABCB5+ Limbal Epithelial Stem Cell Cultures
Source: Hindawi journal article supplement (doi:10.1155/2017/7678637), 2017-01-01

## Supplementary Figures

Figure S1: Cultivation of LECs in various culture conditions. Isolated LECs cultured on 5% matrigel, 0.05 mg/ml fibronectin, or a mixture of 5% matrigel + 0.05 mg/ml fibronectin in CnT20 or 10% DMEM for 15 days. Scale bar = 100  $\mu$ m.

Figure S2: Stem cell marker analysis of ABCG2+/ABCB5+ LESC. Total mRNA was isolated from ABCG2+/ABCB5+ LESC cultured in 10% DMEM, CnT20, or CnT30 and gene expression was assessed by RT-PCR. \*\*  $p < 0.01$  vs DMEM.

Figure S3: Colony formation analysis of ABCG2+/ABCB5+ LESC. ABCG2+/ABCB5+ LESC were seeded and cultured for 8 days. Colony formation was monitored by staining with antibodies to ABCG2 and P63 $\alpha$ . Scale bar = 500  $\mu$ m and 200  $\mu$ m.

Supplementary Table S1

|                     |                                    |       |                                     |
|---------------------|------------------------------------|-------|-------------------------------------|
| p63 $\alpha$        | (sense)- accatcagaagatggtgcga      | OCT4  | (sense)- aagcgatcaagcagcgacta       |
|                     | (antisense)- ccagggttcgtgtactgtggc |       | (antisense)- gaagtgagggtcccatagc    |
| ABCG2               | (sense)- ttggctgtcatggcttcagt      | SOX2  | (sense)- gaccagctcgcagacctaca       |
|                     | (antisense)- ctggtgcattgagtcctggg  |       | (antisense)- gaagaggtaaccacagggggg  |
| CK3                 | (sense)- gggcgaggagtacaggatgt      | NANOG | (sense)- cagaaaaacaactggccgaa       |
|                     | (antisense)- gccgtaacctcctccatagc  |       | (antisense)- ggtctggttgetccacattg   |
| CK19                | (sense)- acacactggcagaaacggag      | C-MYC | (sense)- agcaacaaccgaaaatgcac       |
|                     | (antisense)- gacttgatgtccatgagccg  |       | (antisense)- ccgttttagctcgttctcc    |
| Integrin $\alpha$ 9 | (sense)- atgggaaccagaagaggtg       | KLF4  | (sense)- taccaagagctcatgccacc       |
|                     | (antisense)-cagcagcaggaagatgagga   |       | (antisense)- ctttgttaggttttggccgc   |
| CK12                | (sense)- ggagattgagacctaccgcc      | GAPDH | (sense)- atggggaaggtgaaggtcg        |
|                     | (antisense)- attttcgggttttggttgg   |       | (antisense)- ggggtcattgatggcaacaata |

# Supplementary Figure 1

LEC: Limbal epithelial cells

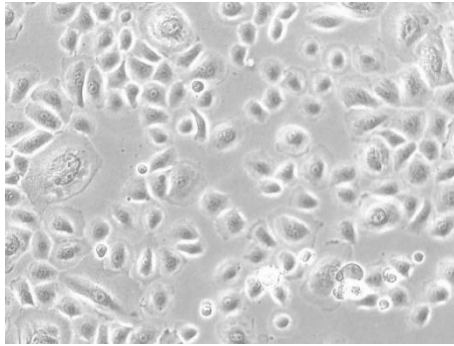

CnT20

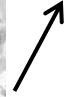

DMEM  
(10% Serum)

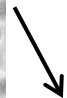

Matrigel 5%

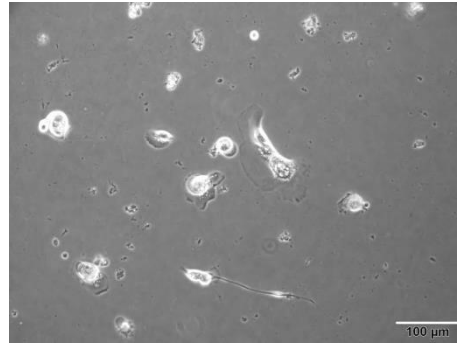

Fibronectin (0.05mg/ml)

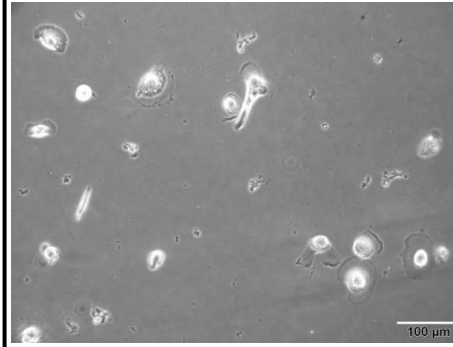

5%matrigel+  
0.05mg/ml fibronectin

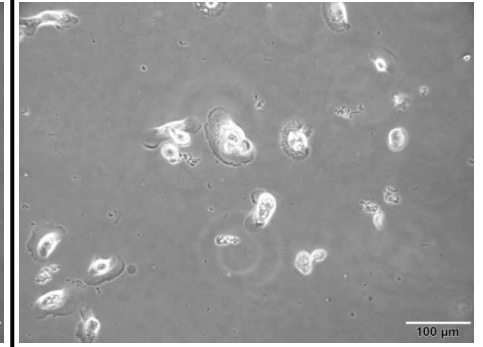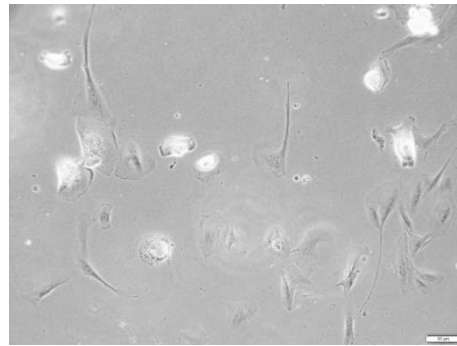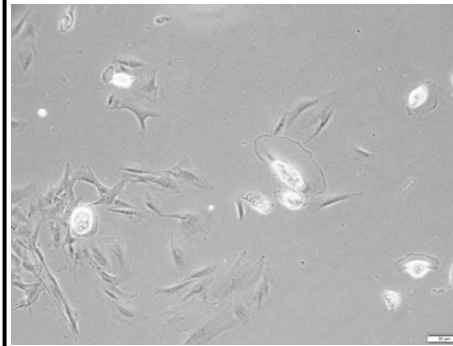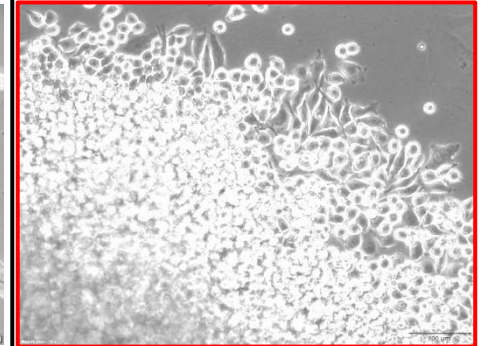

Supplementary Figure 2

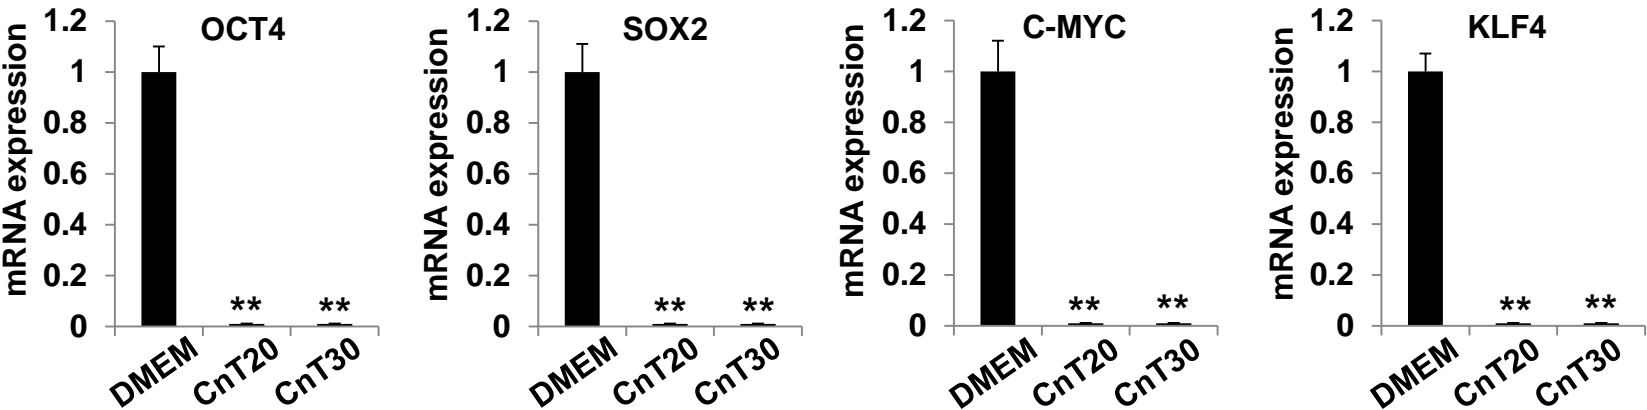

# Supplementary Figure 3

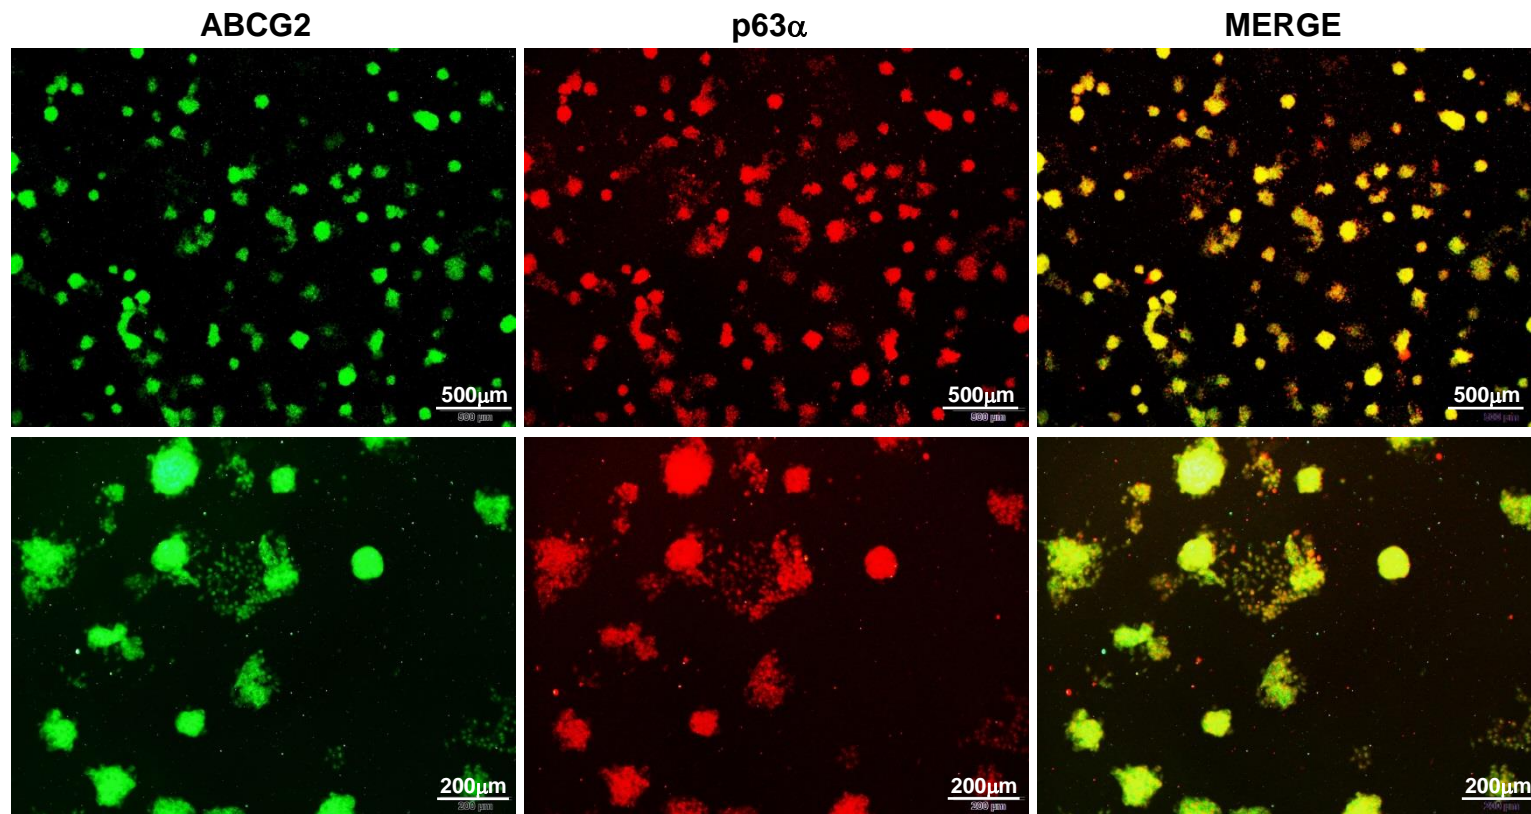

Supplement: f1 [file 7678637.f1.pdf]
